# Supplementary material for: Unique, Intersecting, and Overlapping Roles of C/EBP β and CREB in Cells of the Innate Immune System
Source: PubMed Central journal article supplement (PMC6240029; doi:10.1038/s41598-018-35184-y), 2018-11-16
Supplement: 41598_2018_35184_MOESM1_ESM.pdf [file 41598_2018_35184_MOESM1_ESM.pdf]

## Supplementary Information

### Unique, Intersecting, and Overlapping Roles of C/EBP $\beta$ and CREB in Cells of the Innate Immune System

Jason L. Larabee, Garrett Hauck, and Jimmy D. Ballard\*

Department of Microbiology and Immunology, The University of Oklahoma Health Sciences Center, Oklahoma City, OK 73190

\*Corresponding Author: Jimmy D. Ballard, The University of Oklahoma Health Sciences Center, Department of Microbiology and Immunology, BMSB: 1053, 940 Stanton L. Young Blvd. Oklahoma City, OK 73104. Phone: 405-271-2133. E-mail: [jimmy-ballard@ouhsc.edu](mailto:jimmy-ballard@ouhsc.edu)

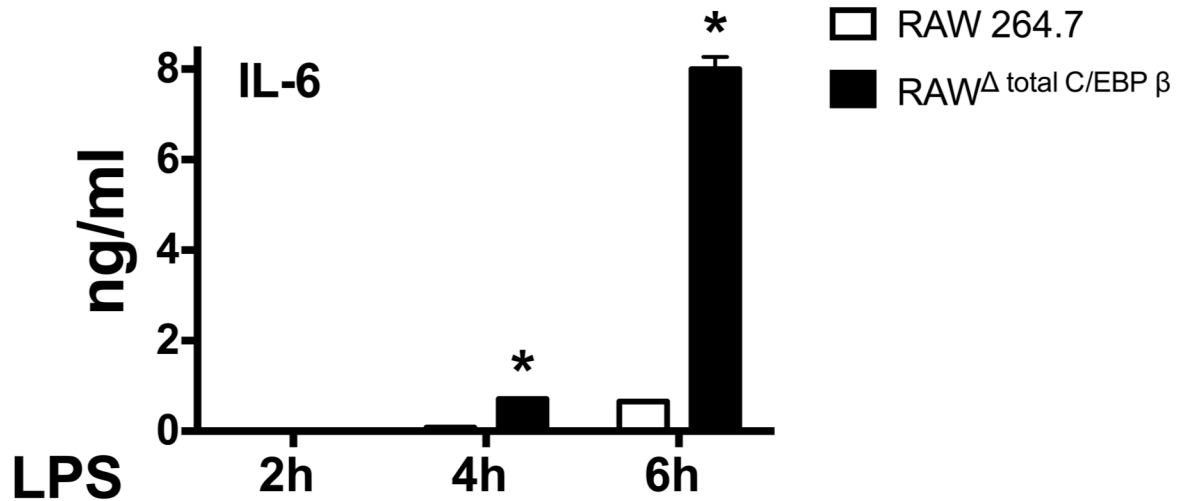

**Supplementary Fig. S1. Absence of C/EBP  $\beta$  expression increases the secretion of IL-6 from macrophages.** RAW 264.7 cells were transduced with lentivirus containing Cas9 and gRNA directed against C/EBP  $\beta$ . Following transduction, clones were selected that do not express any of the 3 forms of C/EBP  $\beta$  (RAW $\Delta$ total C/EBP $\beta$ ). RAW $\Delta$ total C/EBP $\beta$  cells and control RAW 264.7 cells were exposed to 1  $\mu$ g/ml LPS for times indicated on the bar graph. IL-6 secreted into culture media was quantified by ELISA using a kit from Thermo Fisher Scientific. (Catalogue number: 88-7064-22). These data are presented as mean (n = 3)  $\pm$  S.D. Asterisks indicate significant different than control cells. \*, p < 0.001.
